# Supplementary material for: Ischaemic colitis
Source: HighWire-hosted journal article supplement (doi:10.1136/bmj.i6600), 2016-12-22
Supplement: bmj.i6600.pdf [file bmj.i6600.pdf]

### 临床进展

## 缺血性结肠炎

Clinical updates

## Ischaemic colitis

来源:BMJ 2016;355:i6600 doi: 10.1136/bmj.i6600

从 1976—1980 年至 2005—2009 年,在美国,缺血性结肠炎的发病率从 6.1/10 万上升至 22.9/10 万<sup>1,2</sup>。急诊内、外科医师几乎每个月都会接诊缺血性结肠炎患者。随着老龄化及基础疾病的增多,缺血性结肠炎的发病风险增加<sup>3</sup>。少数患者会表现为慢性缺血性结肠炎。

本文总结了有关缺血性结肠炎诊断、治疗和临床指南,供急诊非消化专科医师参考。

### 什么是缺血性结肠炎,病因如何?

缺血性结肠炎和肠系膜缺血是不同的疾病,但经常难以区分,表 1 列举了两者间的差异。当出现急性、短暂的血流速度减慢,低于结肠代谢所需时,就会发生缺血性结肠炎。血供减少导致肠黏膜溃疡、炎症和出血。低灌注的持续时间和严重程度决定了结肠损伤是缺血性损伤还是再灌注损伤<sup>4</sup>。图 1 显示了结肠的动脉供血和最常见缺血性结肠炎的部位。

缺血性结肠炎常有多种病因,合并症较多的患者患缺血性结肠炎的风险较高。框图 1 列举了缺血性结肠炎的常见病因。

### 方法

我们使用关键词“ischaemic colitis”“ischaemia + colon”“surgery + colitis”检索 Medline 数据库,共得到 1 109 篇文章。大部分搜索的文献并不是主要讨论缺血性结肠炎,与本综述无关。本综述主要纳入那些研究设计严谨、数据分析可信、结果可靠的文献。

### 你需要知道

- 缺血性结肠炎不同于肠系膜缺血或缺血性肠病。
- 缺血性结肠炎起病较急,有较高的病死率。
- 怀疑缺血性结肠炎的患者需要立即收入消化科病房,且有外科医生协助诊疗。
- 部分缺血性结肠炎患者可经保守治疗好转。
- 计算机断层扫描(CT)用于初步诊断缺血性结肠炎,48 小时内行结肠镜检查可以提供预后信息和明确诊断。

### 缺血性结肠炎的症状和体征是什么?

急性期表现为腹泻、便血、腹部绞痛<sup>12</sup>。典型的体征包括腹胀,但受累肠段有局部压痛、肌紧张。腹膜炎体征提示肠壁全层缺血、穿孔或其他急腹症。起病急骤这一点有助于鉴别缺血性结肠炎、炎症性肠病及感染性结肠炎<sup>13</sup>。缺血性结肠炎在数小时内起病,而炎症性肠病或感染性结肠炎常隐匿起病,伴随全身症状的加重而加重。

缺血性结肠炎可导致全身炎症反应综合征(SIRS),出现心动过速、低血压、气喘,偶有发热,而无感染证据。如果不能正确处理,患者可能出现休克,导致多器官功能衰竭。临床上有时难以区分感染、炎症或缺血性结肠炎。全科医师需要识别病情恶化的重症患者,并及时寻求专科医生的帮助。

J M Trotter  
specialist registrar in  
general surgery<sup>1</sup>,  
L Hunt  
specialist registrar in  
diabetes and  
endocrinology<sup>2</sup>,  
M B Peter  
consultant general  
surgeon<sup>1</sup>

<sup>1</sup>Department of  
Surgery, Scarborough  
General Hospital,  
Scarborough YO12  
6QL, UK;

<sup>2</sup>Department of  
Diabetes,  
Endocrinology and  
Metabolism, Sheffield  
Teaching Hospitals,  
Royal Hallamshire  
Hospital, Sheffield  
S10 2JF, UK

Correspondence to:  
J M Trotter  
j.trotter@nhs.net

刘爱玲 译  
吕红校  
北京协和医院  
消化科

表1 肠系膜缺血和缺血性结肠炎的区别

| 特点    | 肠系膜缺血(缺血性肠病) | 缺血性结肠炎             |
|-------|--------------|--------------------|
| 起病时症状 | 突发           | 数小时                |
| 病因    | 栓塞           | 多因素                |
| 血供减少  | 受累肠段完全无血供    | 一过性缺血              |
| 症状和体征 | 腹痛重,体征轻      | 中度腹痛和受累肠段区域腹部压痛,便血 |
| 治疗    | 急诊手术         | 保守治疗,必要时手术         |

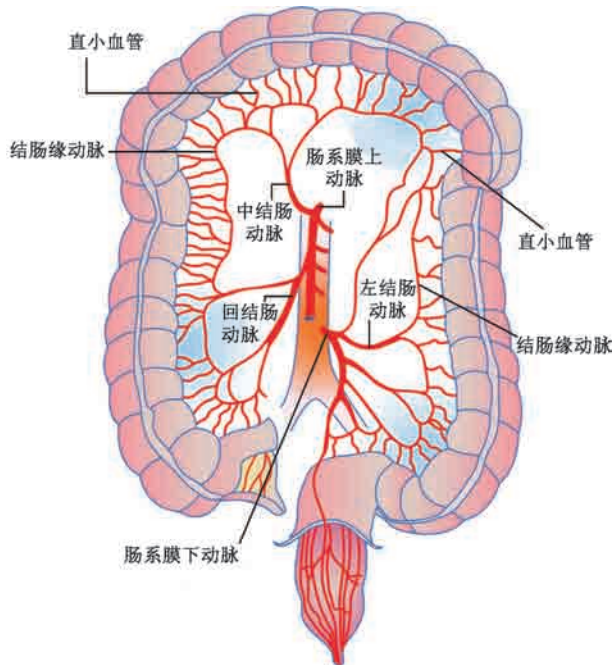

图1 动脉供血和常见的缺血性结肠炎的部位。结肠接受肠系膜上下动脉的供血。供血薄弱点,即“分水岭区”为各支动脉供血的区域<sup>5</sup>,如结肠脾曲和横结肠。当血流速度减慢时分水岭区最容易缺血,因为该区的血管分支最少。

### 如何诊断缺血性结肠炎?

怀疑缺血性结肠炎的患者应尽快安排检查确诊。美国胃肠病学学会推荐患者在入院数小时内完成计算机断层扫描

#### 框图1 缺血性结肠炎的常见病因

##### 生理性

系统性——心力衰竭、全身炎症反应综合征(SIRS)、动脉粥样硬化

栓塞——房颤

血栓形成——合并肿瘤和血液系统疾病<sup>6</sup>

##### 医源性

药物——化疗药物、性激素、干扰素、伪麻黄碱、强心苷、利尿剂、他汀类、非甾体类消炎药(NSAIDs)、免疫抑制剂、血管加压药<sup>6,7</sup>

手术——腹主动脉瘤修补术<sup>8</sup>

内镜——结肠镜<sup>4,11</sup>

(CT)检查,并由高年资医师负责患者的诊疗事项<sup>4</sup>。结肠镜应在入院48小时内完成,以评估肠黏膜情况并明确诊断。

临床上,对腹痛患者评估的常用检查方法是腹部X线片和B超,但在缺血性结肠炎中并不推荐。即便如此,这2项检查有时也能提供一些信息,例如X线表现为指压痕征(thumbprinting),多普勒超声显示肠壁厚、血流速度减低,这些征象可提示缺血性结肠炎<sup>14-17</sup>。CT可提供更多的诊断信息。与B超比较,CT并不依赖于操作者的个人经验,且可以很快得出结果。

### 实验室检查

如出现便血,需行凝血和血红蛋白检查。炎症指标如C反应蛋白、中性粒细胞等可能会升高。缺血性结肠炎的炎症反应会增加急性肾衰竭的风险,故需检查肾功能。

因组织低灌注和器官功能不全,血清乳酸可上升。这种情况下,监测乳酸是为了判断治疗过程中病情有无进展。乳酸升高并不一定代表肠道缺血,而乳酸正常也不能完全除外肠道缺血<sup>18</sup>。

### 增强CT

CT可迅速提供信息,在缺血性结肠炎的阳性率可高达98%。CT表现包括肠壁增厚、肠壁异常强化或无强化、肠扩张、肠系膜索条影(mesenteric stranding)(译者注:该征象提示肠系膜水肿、静脉充血、腹水、积气(肠壁积气)和门静脉积气(图2)<sup>19-20</sup>。CT可用于诊断缺血性结肠炎,但不能显示病变的严重程度<sup>19</sup>,因而在判断预后方面价值有限。出现上述影像学改变(特别是在肠系膜上动脉和肠系膜下动脉之间的分水岭区域)提示缺血性结肠炎,但不能完全区分其他类型的结肠炎。CT的另一优势是除外其他急腹症(如穿孔),并改变治疗策略。

### 内镜评估

早期内镜检查可通过直视下观察病变,明确诊断<sup>4</sup>,提供预后信息,并决定治疗方案是保守治疗还是急诊手术。缺血性结肠炎的内镜表现包括:

- 点状出血
- 黏膜水肿、易脆
- 节段性红斑
- 散在糜烂
- 纵行溃疡(结肠单个条纹征)(图3)

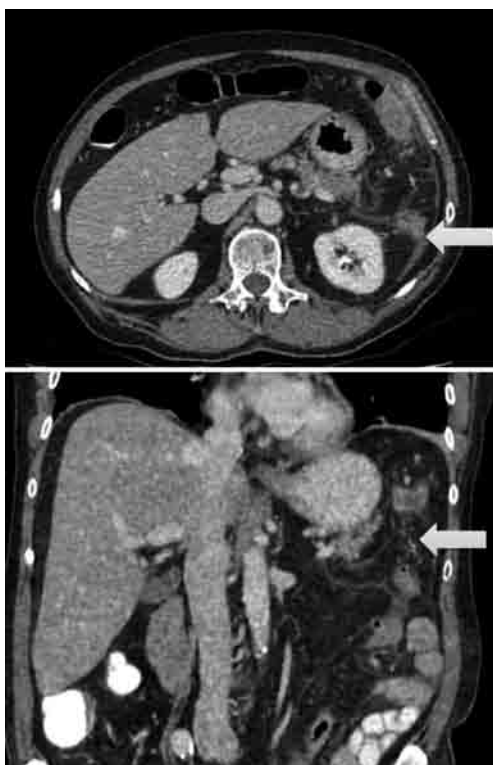

图2 腹部计算机断层扫描(CT)(轴位和冠状位)示脂肪条纹征(脂肪密度增加,为炎症表现)和结肠脾区增厚(箭头),继发于缺血性结肠炎

- 受累肠段边界清楚<sup>21</sup>。

黏膜苍白和假息肉提示全肠壁缺血。

有经验的医生实施结肠镜检查,对于缺血性结肠炎患者而言是相对安全的,这也是多数学者的推荐意见<sup>4,22</sup>。在最新发表的指南中,一项回顾性研究纳入659例<sup>23-24</sup>,无一例结肠镜操作相关的穿孔发生<sup>4</sup>。

## 可行的治疗有哪些?

### 初步复苏

目前没有对缺血性结肠炎复苏治疗的指南。一般复苏治疗的原则包括:

- 静脉液体复苏
- 通过留置尿管观察尿量,以监测液体平衡
- 通过血气检查评估酸碱状态
- 糖尿病患者应注意控制和监测血糖。

尽管目前还没有缺血性结肠炎液体复苏的明确证据,但对SIRS患者,积极的液体复苏可以改善预后,对于合并脓毒症和胰腺炎的患者,也有液体复苏的具体要求<sup>25-26</sup>。

经过有效的液体复苏,部分患者的结肠炎症和相关症状缓解,不需要手术。这类不需要手术干预的患者比例差异较大,反映了临床实践中不同的处理方法,目前缺少有关缺血性结肠炎治疗的统一的指南。

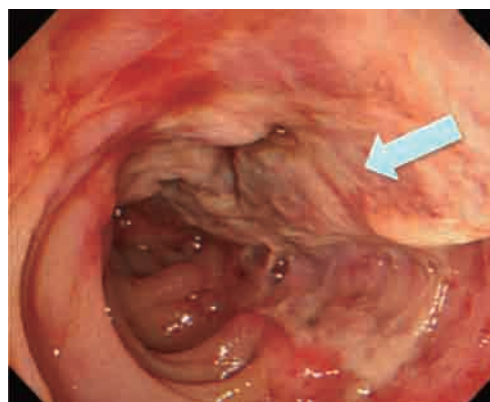

图3 缺血性结肠炎受累肠段的内镜下表现为黏膜炎症、单个条纹征[单个的纵行溃疡(箭头)]

### 手术治疗

如果影像学提示穿孔、出现弥漫性腹膜炎、持续出血致循环不稳或需要反复输血,则需要考虑手术。无上述情况的患者,保守治疗无效时是否手术,还需要具体分析。

保守治疗无法解决的严重事件的相关危险因素包括:

- 右半结肠受累
- 男性
- 无便血
- 肾功能损伤
- 结肠狭窄
- 腹膜炎

当存在一个或多个上述因素时,需警惕出现肠壁缺血的症状和体征,如腹痛加重或腹膜炎。对于临床症状未改善的患者,需及时复查生化指标。对临床症状或生化指标恶化的患者,需重复影像学检查,必要时手术干预。

一篇系统性综述提到,缺血性结肠炎需要手术干预者有较高的病死率(37%~48%)<sup>4,30</sup>,而保守治疗者的病死率仅为6.2%<sup>17,22</sup>。手术包括切除部分肠段和结肠造口。病情不稳定的患者实施复杂的大手术可能加重病情,导致预后不良,故应尽量避免<sup>31</sup>。

## 缺血性结肠炎患者的内科治疗

### 抗凝治疗

推荐预防性抗凝,但并不推荐治疗性抗凝。英国国家健康与临床优选研究所(NICE)指南推荐:对于没有禁忌证的患者,包括缺血性结肠炎患者,均推荐静脉血栓的物理和药物性预防<sup>32</sup>。NICE指南建议术后应继续预防性抗凝,直到患者可自由活动。

### 心脏栓塞

与对照组比较,缺血性结肠炎患者心脏栓塞的发生率较高(43%比23%)<sup>33</sup>。这可能是偶然发现的<sup>25-35</sup>。当出现心脏症状和体征时,需行心脏相关检查<sup>33</sup>。

### 营养支持

疑似缺血性结肠炎的患者入院后,大部分需要禁食,直到决定是否需要进行外科手术。现代外科已经抛弃了长期禁食的观点。给予肠内营养有助于尽快恢复正常的肠道菌群。禁食超过1周时需要给予肠外营养。

### 抗生素

尽管证据支持力度较低,但最新的美国胃肠病学会有关缺血性结肠炎的指南推荐抗生素治疗。使用哪一种类的抗生素,需要参考抗生素指南,并考虑当地的用药方案和抗生素耐药情况。

#### 当前的研究热点

- 抗凝药是否可预防缺血性结肠炎的再发?
- 对于缺血性结肠炎患者而言,多普勒超声检查是否在各个医疗中心都较容易实施?
- 缺血性结肠炎患者计算机断层扫描(CT)发现肠系膜血管狭窄,是否需要血管造影及介入治疗?

#### 患者是否参与本文创作?

没有患者直接参与文章的创作。

#### 患者信息

以下资源为没有接受过医学教育的患者提供的有关缺血性结肠炎的知识:

- MayoClinic.Ischemiccolitis.[www.mayoclinic.org/diseases-conditions/ischemic-colitis/basics/definition/con-20026677](http://www.mayoclinic.org/diseases-conditions/ischemic-colitis/basics/definition/con-20026677)
- Healthline.Ischemiccolitis.[www.healthline.com/health/ischemic-colitis#Overview1](http://www.healthline.com/health/ischemic-colitis#Overview1)

### 缺血性结肠炎的长期治疗有哪些?

缺血性结肠炎是多种因素导致的,常发生在有多种合并症的患者中。治疗缺血性结肠炎时,需要为患者提供生活方式的指导,以减少病情复发,包括:

- 戒烟
- 减少饮酒
- 增加锻炼

没有指南或证据显示抗血小板治疗对缺血性结肠炎有效。缺血性结肠炎不是仅由动脉粥样硬化引起的,并不是开始抗血小板治疗的理由。

### 药物

缺血性结肠炎患者可能口服使结肠血流减慢的药物。这些药物通常用于初级或二级预防缺血性心脏病,如血管紧张素转换酶抑制剂(ACEI)类药物或β受体阻断剂(见框

图1)。如果在急性期停用这些药物,再使用时需要小心,以避免出现低血压,加重缺血性结肠炎。

### 随访

没有并发症的缺血性结肠炎患者通常在入院后由外科医师随访一次,出院后回到社区医疗中心。慢性或复发的缺血性结肠炎的发生率为6.8%~16%<sup>4</sup>。患者可能出现结肠缺血部位的狭窄,表现为腹胀、便秘、腹部绞痛,或仅表现为贫血的慢性溃疡出血。缺血性结肠炎的慢性症状虽然较少,但多为非特异性的。如果有类似发现,需要将患者交给专科医师,以确定诊断。

#### 医学继续教育资源

以下资源可提供更多关于缺血性结肠炎的知识,帮助医生识别和处理表现为全身炎症反应综合征(SIRS)的急性缺血性结肠炎患者:

##### 结肠缺血

- Brandt LJ, Feuerstadt P, Longstreth GF, Boley SJ; American College of Gastroenterology.ACG clinical guideline: epidemiology, riskfactors, patterns of presentation, diagnosis, and management of colon ischemia (CI). *Am J Gastroenterol* 2015;110:18-44. [www.nature.com/ajg/journal/v110/n1/abs/ajg2014395a.html](http://www.nature.com/ajg/journal/v110/n1/abs/ajg2014395a.html)
- Up To Date. Colonic ischemia.[www.uptodate.com/contents/colonic-ischemia?source=search\\_result&search=ischaemic+colitis&selectedTitle=1%7E56](http://www.uptodate.com/contents/colonic-ischemia?source=search_result&search=ischaemic+colitis&selectedTitle=1%7E56)

##### SIRS

- UpToDate. Sepsis syndromes in adults: epidemiology, definitions, clinical presentation, diagnosis, and prognosis. [www.uptodate.com/contents/sepsis-and-the-systemic-inflammatory-response-syndrome-definitions-epidemiology-and-prognosis](http://www.uptodate.com/contents/sepsis-and-the-systemic-inflammatory-response-syndrome-definitions-epidemiology-and-prognosis)
- Medscape. Systemic inflammatory response syndrome. <http://emedicine.medscape.com/article/168943-overview>

贡献者(Contributors): JMT is lead author, LH is generalist advisor, and MBP is senior author.

利益竞争(Competing interests): We have read and understood BMJ policy on declaration of interests and have no relevant interests to declare.

来源与同行评议(Provenance and peer review): Not commissioned; externally peer reviewed.

#### 参考文献

- 1 Boley SJ, Schwartz S, Lash J, Sternhill V. Reversible vascular occlusion of the colon. *Surg Gynecol Obstet* 1963;116:53-60.pmid:13968597.
- 2 Yadav S, Dave M, Edakkanambeth Varayil J, et al. A population-based study of incidence, risk factors, clinical spectrum, and outcomes of ischemic colitis. *Clin Gastroenterol*

- Hepatology* 2015;13:731-8.e1, 6, quiz e41. doi:10.1016/j.cgh.2014.07.061 pmid:25130936.
- 3 Office for National Statistics. Life expectancy. 2015. <http://ons.gov.uk/ons/taxonomy/index.html?nscl=Disability-free+Life+Expectancy#tab-data-tables>.
  - 4 Brandt LJ, Feuerstadt P, Longstreth GF, Boley SJ. American College of Gastroenterology. ACG clinical guideline: epidemiology, risk factors, patterns of presentation, diagnosis, and management of colon ischemia (CI). *Am J Gastroenterol* 2015;110:18-44, quiz 45. doi:10.1038/ajg.2014.395 pmid:25559486.
  - 5 Griffiths JD. Surgical anatomy of the blood supply of the distal colon. *Ann R Coll Surg Engl* 1956;19:241-56. pmid:13363265.
  - 6 Hass DJ, Kozuch P, Brandt LJ. Pharmacologically mediated colon ischemia. *Am J Gastroenterol* 2007;102:1765-80. doi:10.1111/j.1572-0241.2007.01260.x pmid:17488249.
  - 7 Bielefeldt K. Ischemic colitis as a complication of medication use: an analysis of the Federal Adverse Event Reporting System. *Dig Dis Sci* 2016;61:2655-65. doi:10.1007/s10620-016-4162-x pmid:27073073.
  - 8 Perry RJ, Martin MJ, Eckert MJ, Sohn VY, Steele SR. Colonic ischemia complicating open vs endovascular abdominal aortic aneurysm repair. *J Vasc Surg* 2008;48:272-7. doi:10.1016/j.jvs.2008.03.040 pmid:18572356.
  - 9 Omar H, Siglin S, Fine M. Ischemic colitis after routine colonoscopy. *Am J Gastroenterol* 2014;109(Suppl 2):S453.
  - 10 Behzadi J, Kanuru R, Pfeil S. Colonoscopy prep-induced ischemic colitis. *Am J Gastroenterol* 2015;11(Suppl 1):S152-3.
  - 11 Da Silva E. Ischemic colitis after a routine colonoscopy: report of two cases. *Am J Gastroenterol* 2014;109(Suppl 2):S397.
  - 12 Mosele M, Cardin F, Inelmen EM, et al. Ischemic colitis in the elderly: predictors of the disease and prognostic factors to negative outcome. *Scand J Gastroenterol* 2010;45:428-33. doi:10.3109/00365520903513225 pmid:20030571.
  - 13 Sawczenko A, Sandhu BK. Presenting features of inflammatory bowel disease in Great Britain and Ireland. *Arch Dis Child* 2003;88:995-1000. doi:10.1136/adc.88.11.995 pmid:14612366.
  - 14 Wolf EL, Sprayregen S, Bakal CW. Radiology in intestinal ischemia. Plain film, contrast, and other imaging studies. *Surg Clin North Am* 1992;72:107-24. doi:10.1016/S0039-6109(16)45630-6 pmid:1731379.
  - 15 Lim JH, Ko YT, Lee DH, Lim JW, Kim TH. Sonography of inflammatory bowel disease: findings and value in differential diagnosis. *AJR Am J Roentgenol* 1994;163:343-7. doi:10.2214/ajr.163.2.8037027 pmid:8037027.
  - 16 Danse EM, Van Beers BE, Jamart J, et al. Prognosis of ischemic colitis: comparison of color doppler sonography with early clinical and laboratory findings. *AJR Am J Roentgenol* 2000;175:1151-4. doi:10.2214/ajr.175.4.1751151 pmid:11000181.
  - 17 Ripollés T, Simó L, Martínez-Pérez MJ, Pastor MR, Igual A, López A. Sonographic findings in ischemic colitis in 58 patients. *AJR Am J Roentgenol* 2005;184:777-85. doi:10.2214/ajr.184.3.01840777 pmid:15728597.
  - 18 Leone M, Bechis C, Baumstarck K, et al. Outcome of acute mesenteric ischemia in the intensive care unit: a retrospective, multicenter study of 780 cases. *Intensive Care Med* 2015;41:667-76. doi:10.1007/s00134-015-3690-8 pmid:25731634.
  - 19 Cruz C, Abujudeh HH, Nazarian RM, Thrall JH. Ischemic colitis: spectrum of CT findings, sites of involvement and severity. *Emerg Radiol* 2015;22:357-65. doi:10.1007/s10140-015-1304-y pmid:25732355.
  - 20 Berritto D, Iacobellis F, Mazzei MA, et al. MDCT in ischaemic colitis: how to define the aetiology and acute, subacute and chronic phase of damage in the emergency setting. *Br J Radiol* 2016;89:20150821. doi:10.1259/bjr.20150821 pmid:27007462.
  - 21 Zou X, Cao J, Yao Y, Liu W, Chen L. Endoscopic findings and clinicopathologic characteristics of ischemic colitis: a report of 85 cases. *Dig Dis Sci* 2009;54:2009-15. doi:10.1007/s10620-008-0579-1 pmid:19089615.
  - 22 O'Neill S, Yalamarthi S. Systematic review of the management of ischaemic colitis. *Colorectal Dis* 2012;14:e751-63. doi:10.1111/j.1463-1318.2012.03171.x pmid:22776101.
  - 23 Longstreth GF, Yao JF. Epidemiology, clinical features, high-risk factors, and outcome of acute large bowel ischemia. *Clin Gastroenterol Hepatol* 2009;7:1075-80.e1, 2, quiz 1023. doi:10.1016/j.cgh.2009.05.026 pmid:19500689.
  - 24 Brandt LJ, Feuerstadt P, Blaszcza MC. Anatomic patterns, patient characteristics, and clinical outcomes in ischemic colitis: a study of 313 cases supported by histology. *Am J Gastroenterol* 2010;105:2245-52, quiz 2253. doi:10.1038/ajg.2010.217 pmid:20531399.
  - 25 Working Party of the British Society of Gastroenterology Association of Surgeons of Great Britain and Ireland; Pancreatic Society of Great Britain and Ireland; Association of Upper GI Surgeons of Great Britain and Ireland. UK guidelines for the management of acute pancreatitis. *Gut* 2005;54(Suppl 3):1-9. [http://www.ncbi.nlm.nih.gov/entrez/query.fcgi?cmd=Retrieve&db=PubMed&list\\_uids=15591495&dopt=Abstract&pmid=15591495](http://www.ncbi.nlm.nih.gov/entrez/query.fcgi?cmd=Retrieve&db=PubMed&list_uids=15591495&dopt=Abstract&pmid=15591495).
  - 26 UK Sepsis Trust. Sepsis six. 2013. <http://sepsistrust.org/clinical-toolkit/>.
  - 27 O'Neill S, Elder K, Harrison SJ, Yalamarthi S. Predictors of severity in ischaemic colitis. *Int J Colorectal Dis* 2012;27:187-91. doi:10.1007/s00384-011-1301-x pmid:21842142.
  - 28 Castleberry AW, Turley RS, Hanna JM, et al. A 10-year longitudinal analysis of surgical management for acute ischemic colitis. *J Gastrointest Surg* 2013;17:784-92. doi:10.1007/s11605-012-2117-x pmid:23242848.
  - 29 Reissfelder C, Sweiti H, Antolovic D, et al. Ischemic colitis: who will survive? *Surgery* 2011;149:585-92. doi:10.1016/j.surg.2010.11.008 pmid:21247611.
  - 30 Antolovic D, Koch M, Hinz U, et al. Ischemic colitis: analysis of risk factors for postoperative mortality. *Langenbecks Arch Surg* 2008;393:507-12. doi:10.1007/s00423-008-0300-z pmid:18286300.
  - 31 Weber DG, Bendinelli C, Balogh ZJ. Damage control surgery for abdominal emergencies. *Br J Surg* 2014;101:e109-18. doi:10.1002/bjs.9360 pmid:24273018.
  - 32 National Institute for Health and Care Excellence. Venous thromboembolism: reducing the risk of venous thromboembolism (deep vein thrombosis and pulmonary embolism) in patients admitted to hospital. (Clinical guideline 92.) 2010. [www.nice.org.uk/guidance/CG92](http://www.nice.org.uk/guidance/CG92).
  - 33 Hourmand-Ollivier I, Bouin M, Saloux E, et al. Cardiac sources of embolism should be routinely screened in ischemic colitis. *Am J Gastroenterol* 2003;98:1573-7. doi:10.1111/j.1572-0241.2003.07483.x pmid:12873580.
  - 34 Gatt M, MacFie J. Randomized clinical trial of gut-specific nutrients in critically ill surgical patients. *Br J Surg* 2010;97:1629-36. doi:10.1002/bjs.7155 pmid:20629109.
  - 35 Gatt M, Anderson AD, Reddy BS, Hayward-Sampson P, Tring IC, MacFie J. Randomized clinical trial of multimodal optimization of surgical care in patients undergoing major colonic resection. *Br J Surg* 2005;92:1354-62. doi:10.1002/bjs.5187 pmid:16237744.

BMJ takes no responsibility for the accuracy of the translation from the published English language original and is not liable for any errors that may occur.

**BMJ**
